# Supplementary material for: SP1-induced HOXD-AS1 promotes malignant progression of cholangiocarcinoma by regulating miR-520c-3p/MYCN
Source: publisher site journal article supplement (doi:10.18632/aging.103660), 2020-08-28
Supplement: Supplementary file [file aging-v12i16-103660-supplementary-material-SD2.pdf]

## SUPPLEMENTARY TABLE

**Supplementary Table 1. Primer sequences for qRT-PCR and sequences for siRNA.**

| Nucleic acids               | Sequences                                                                                                  |
|-----------------------------|------------------------------------------------------------------------------------------------------------|
| HOXD-AS1                    | Forward primer: 5'-CCTTGAAAGTGGGTAAAATGTGC-3'<br>Reverse primer: 5'-TAGTTTCCTTGTTCTTTGTGCTGT-3'            |
| GAPDH                       | Forward primer: 5'-GGGAGCCAAAAGGGTCAT-3'<br>Reverse primer: 5'-GAGTCCTTCCACGATACCAA-3'                     |
| SP1                         | Forward primer: 5'-GCACCTGCCCTACTGTAAA-3'<br>Reverse primer: 5'-GTGCCTCTGTAGCTCATCCG-3'                    |
| HOXD-AS1 promoter E1 region | Forward primer: 5'-ACAGCGTTTTGGGTTTTGTG-3'<br>Reverse primer: 5'-AGAATCAAAGTCCCAGCGCA-3'                   |
| HOXD-AS1 promoter E2 region | Forward primer: 5'-ACCTCTCTATGTGCCTGAGTG-3'<br>Reverse primer: 5'-GTGTAAGAAAAGCAGAGAGCAGC-3'               |
| U6                          | Forward primer: 5'-GCTTCGGCAGCACATATACTAAAAT-3'<br>Reverse primer: 5'-CGCTTCACGAATTTGCGTGTGCAT-3'          |
| miR-19b-3p                  | Forward primer: 5'-GTGCAAATCCATGCAAACTGA-3'<br>Reverse primer: 5'-GTGCAGGGTCCGAGGTGCT-3'                   |
| miR-338-3p                  | Forward primer: 5'-TTAGTGTACCAGCCAT-3'<br>Reverse primer: 5'-GAATGCGGGAGCGAA-3'                            |
| miR-106a-5p                 | Forward primer: 5'-GATGCTCAAAAAGTGCTTACAGTGCA-3'<br>Reverse primer: 5'-TATGGTTGTTCTGCTCTCTGTCTC-3'         |
| miR-665                     | Forward primer: 5'-GGTCTACAAAGGGAAGC-3'<br>Reverse primer: 5'-TTTGGCACTAGCACATT-3'                         |
| miR-185-5p                  | Forward primer: 5'-GAAGGATCCGCATGAGAGGGTGTGGAATGC-3'<br>Reverse primer: 5'-GGAGAATTTCGTGCAGGGGCAGCAGACC-3' |
| miR-520c-3p                 | Forward primer: 5'-GCCGCCAAAGTGCTTCCTTTTAG-3'<br>Reverse primer: 5'-TCGCACTGGATACGACACCCTC-3'              |
| miR-17-5p                   | Forward primer: 5'-TGCAAAGTGCTTACAGTGCA-3'<br>Reverse primer: 5'-GTGCAGGGTCCGAGGTATTC-3'                   |
| miR-421                     | Forward primer: 5'-CTCACTCACATCAACAGACATTAATT-3'<br>Reverse primer: 5'-TATGGTTGTTCTGCTCTCTGTGTC-3'         |
| miR-20a-5p                  | Forward primer: 5'-ATGCTAAAGTGCTTATAGT-3'<br>Reverse primer: 5'-CAGTGCAGGGTCCGAGGTATTC-3'                  |
| MYCN                        | Forward primer: 5'-ACTGTAGCCATCCGAGGACA-3'<br>Reverse primer: 5'-CAAGCCCTGCTCCTTACCTC-3'                   |
| si-HOXD-AS1-1               | 5'-CAGATTCACTACTTGACTT-3'                                                                                  |
| si-HOXD-AS1-2               | 5'-GAAAGAAGGACCAAAGTAA-3'                                                                                  |
| si-HOXD-AS1-3               | 5'-GCACAAAGGAACAAGGAAA-3'                                                                                  |
| si-SP1-1                    | 5'-UGUAGAGUCUGCCAACUGACCUGUC-3'                                                                            |
| si-SP1-2                    | 5'-CAGCGUUUCUGCAGCUACCUUGACU-3'                                                                            |
| si-MYCN                     | 5'-GAAGAAAUCGACGUGGUCA-3'                                                                                  |
